# Supplementary material
Source: Springer Nature journal article supplement (https://www.springermedizin.de/resource/supplementary/12889_2011_3928_MOESM2_ESM.pdf/9491090)

## Real Per-Capita GDP

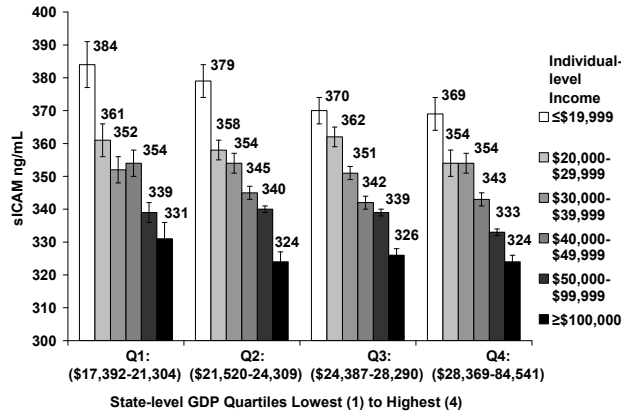

## Median Household Income

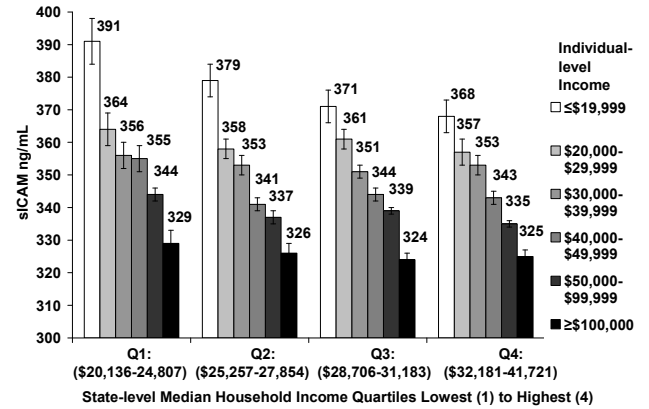

## Average Annual Growth Real Per-Capita GDP 1990-1996

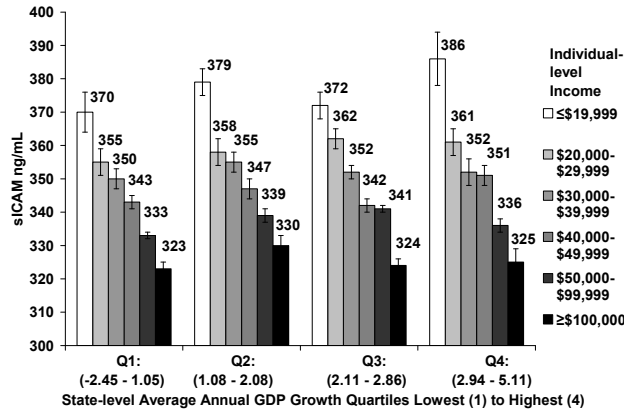

## Gini Coefficient of Household Income Inequality

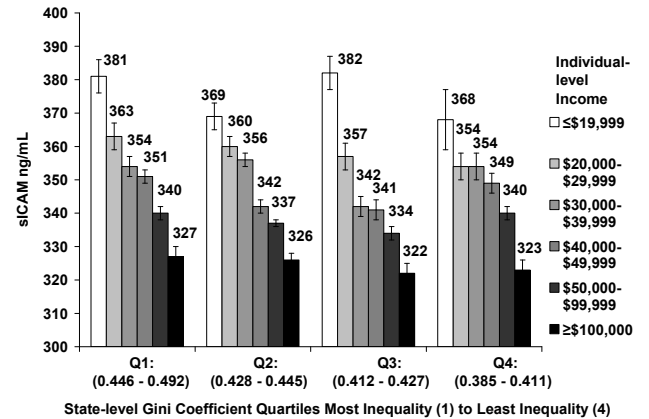

## Percent in Poverty

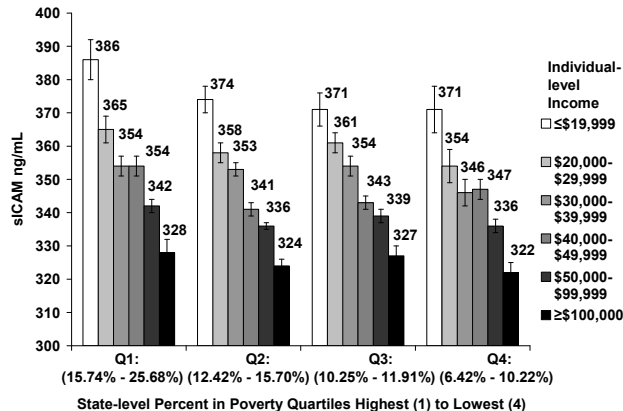

## Per Employee Earnings

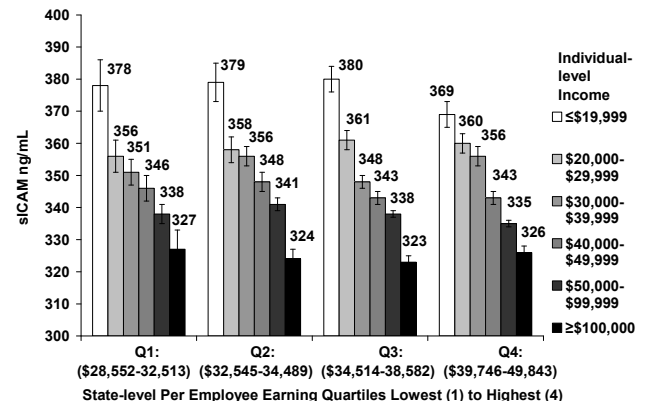

Supplement: MOESM2 [file 9491090]
